# Supplementary material
Source: Springer Nature journal article supplement (https://www.springermedizin.de/resource/supplementary/12985_2006_198_MOESM1_ESM.pdf/9607474)
Supplement: MOESM1 [file 9607474]

M 1 2 3 4 5 6 7 8 9 10

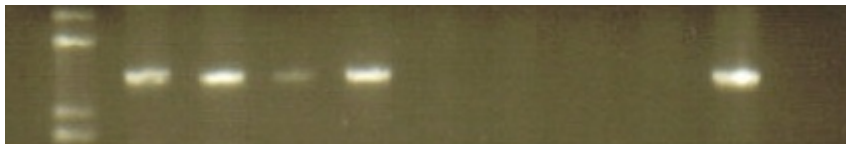

Primer pair VRBF and TMR

M 1 2 3 4 5 6 7 8 9 10

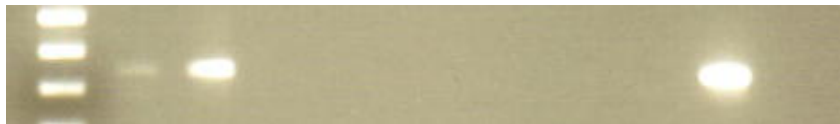

Primer pair VRBF and C-reverse

M 1 2 3 4 5 6 7 8 10

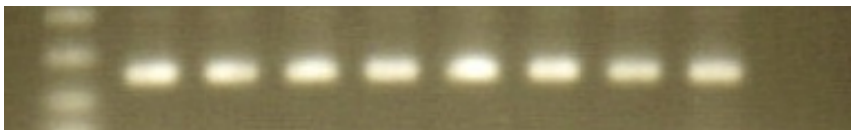

Primer pair porcine mitochondria cytochrome oxidase II
